# Supplementary material
Source: PubMed Central journal article supplement (PMC6610014)

SUPPLEMENTARY DATA

**Supplementary Figure 1.** Differences in adipose cell numbers in abdominal and gluteal depots comparing girls with a low versus a high VAT/(VAT+SAT) ratio. (A) Total number of cells in abdominal and gluteal depot (B) Number of small cells in abdominal and gluteal depot (C) Number of large cells in abdominal and gluteal depot. (D) Correlations between number of small and large cells in the abdominal and gluteal depots in adolescents with low (black) and high (red) VAT/(VAT+SAT) ratio.

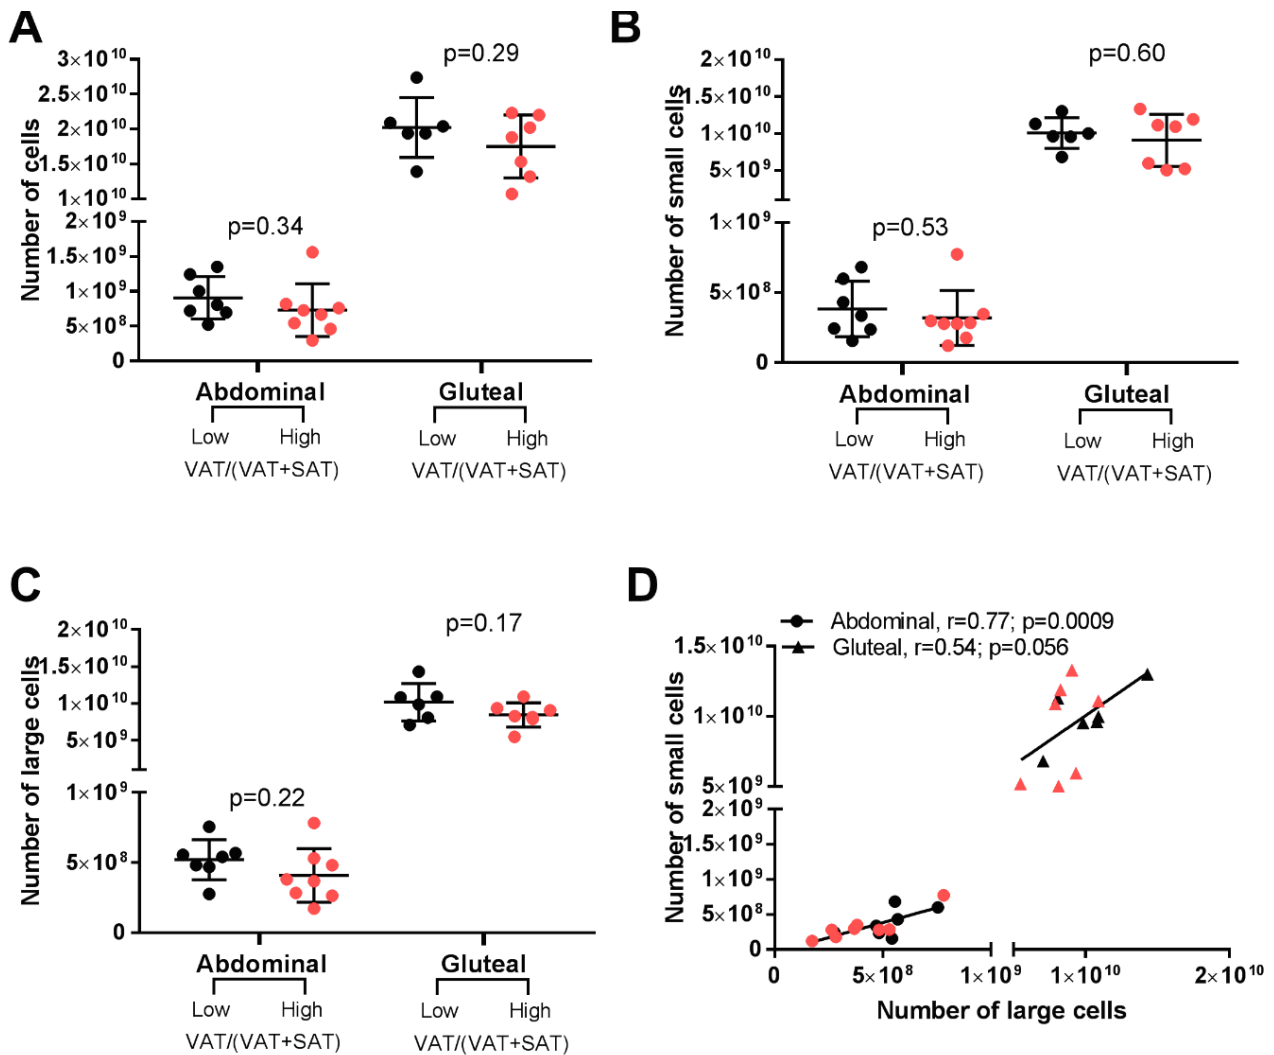

SUPPLEMENTARY DATA

Supplementary Figure 2.  $^2\text{H}_2\text{O}$  body water enrichment measured in urine

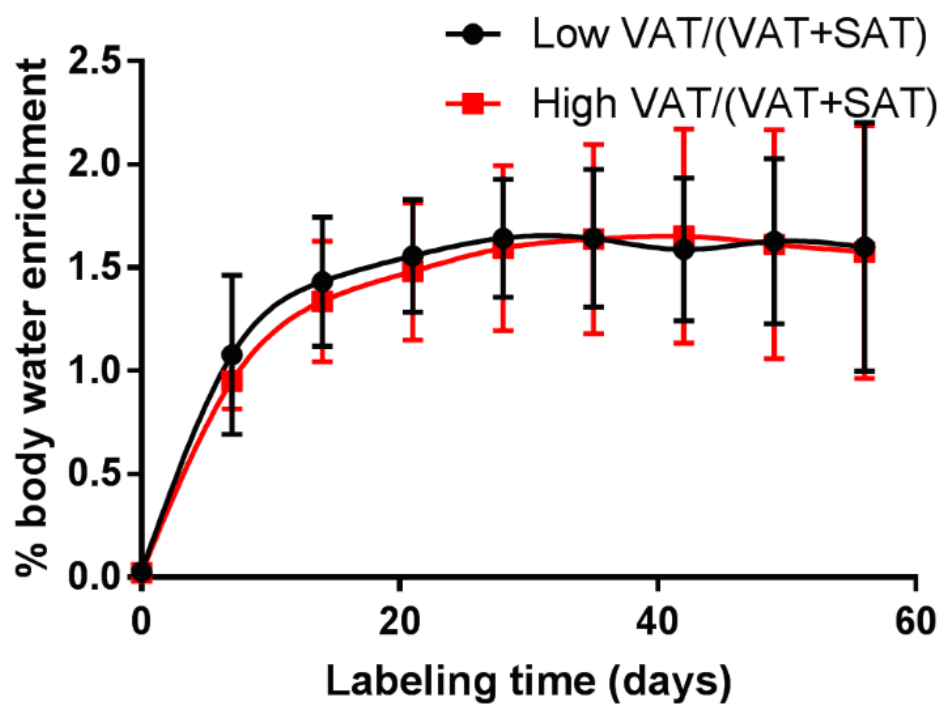

Supplement: DB181162SupplementaryData.pdf [file DB181162SupplementaryData.pdf]
